# Supplementary material
Source: PubMed Central journal article supplement (PMC5339836)
Supplement: cr201717x14.pdf [file cr201717x14.pdf]

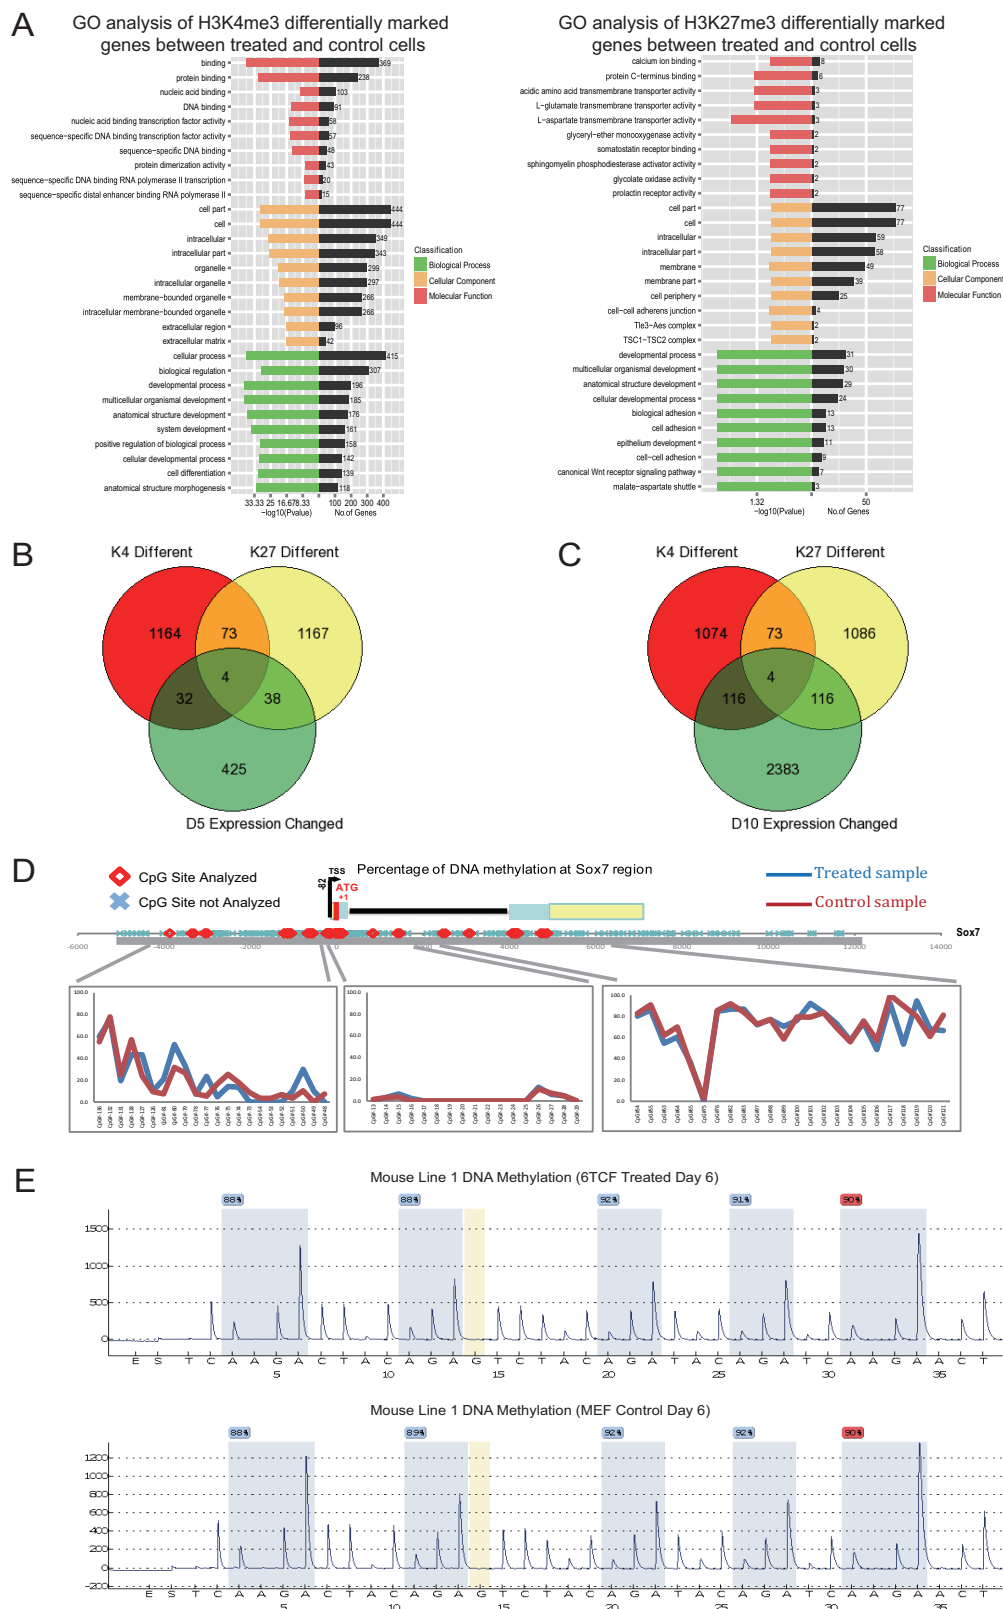

**Supplementary Figure 3:** iMT process is associated with changes in chromatin structure. (A) GO analysis of H3K4me3 or H3K27me3 differentially marked genes between 6TCF treated MEF and control MEF on day 6. (B) A Venn diagram showing the overlap among H3K4me3 differentially marked genes; H3K27me3 differentially marked genes; and significantly changed gene expression after 5 days of 6TCF treatment (FDR<=0.01). (C) A Venn diagram showing the overlap among H3K4me3 differentially marked genes; H3K27me3 differentially marked genes; and significantly changed gene expression after 10 days of 6TCF treatment (FDR<=0.01). (D) Results from DNA methylation analysis of mouse LINE-1 element from 6TCF treated and control MEFs. (E) Pictures of control MEF cells and trans-differentiation colonies produced by retroviral Sox2 overexpression in MEF combined with TCF treatment.
