# Supplementary material
Source: PubMed Central journal article supplement (PMC5339836)
Supplement: cr201717x15.pdf [file cr201717x15.pdf]

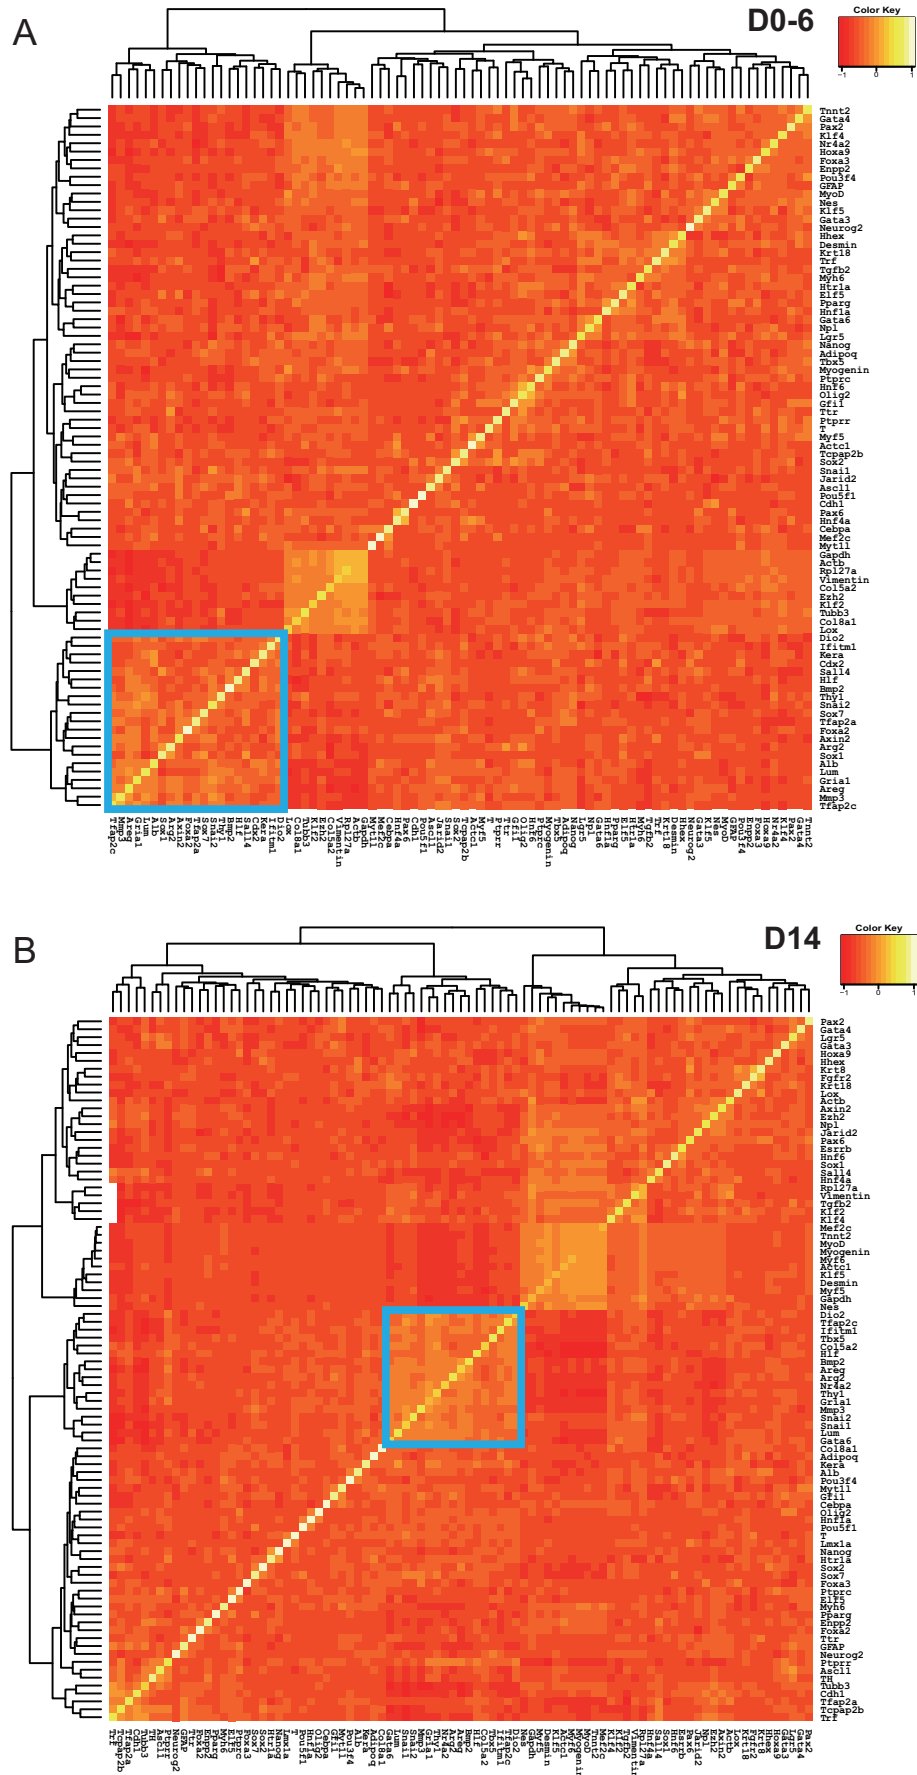

**Supplementary Figure 4:** A unique gene expression module marks the iMT priming state before cell fate decision. (A) A gene expression correlation heatmap from single cell analysis data highlights the iMT priming module during early time point of the multi-lineage trans-differentiation process (Day 0 and Day 6). (B) A gene expression correlation heatmap of single cell analysis data highlights the iMT priming module from D14 samples.
